# Supplementary material
Source: PubMed Central journal article supplement (PMC4464937)

BIOTIN  $\Sigma$ -VKCGSRRRERCYRLVRRQRSAD $\Sigma$ EQ

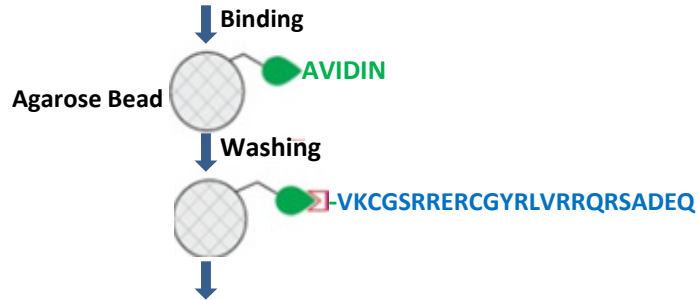

Binding of affinity purified **DDK-AKAP1** protein to immobilized **unmethylated ER $\beta$  peptide**

BIOTIN  $\Sigma$ -VKCGSRRRERCYRLVRRQRSAD $\Sigma$ EQ

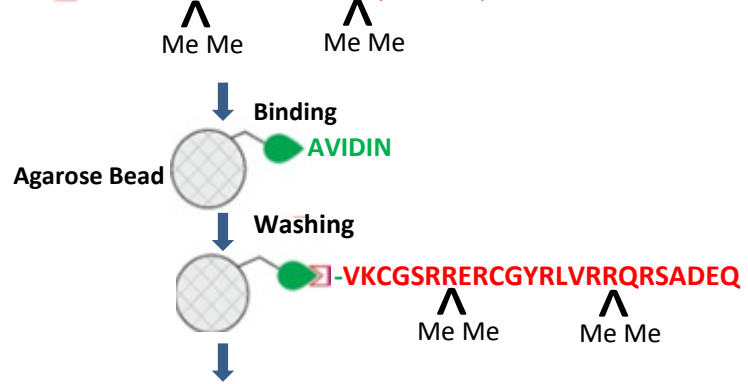

Binding of affinity purified **DDK-AKAP1** protein to immobilized **methylated ER $\beta$  peptide**

Washed, Eluted, and Analyzed by Western

Input AKAP1  
Unmethylated ER $\beta$  peptide  
Methylated ER $\beta$  peptide

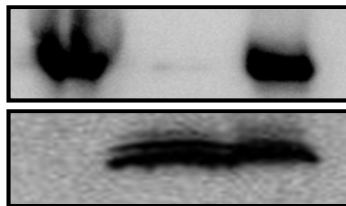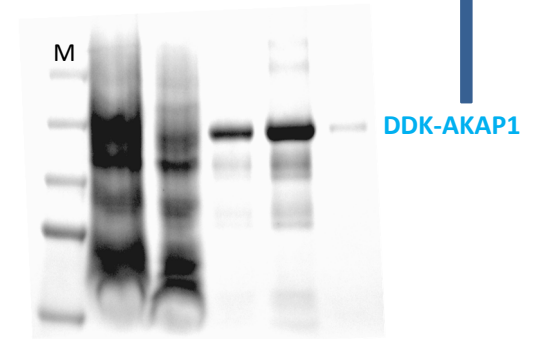

AKAP1 purified by using Anti-DYKDDDDK-agarose Beads

Cell lysed in RIPA buffer

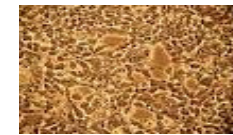

HEK293 CELLS

transfected

Full length AKAP1 cDNA

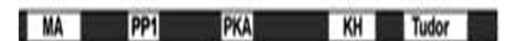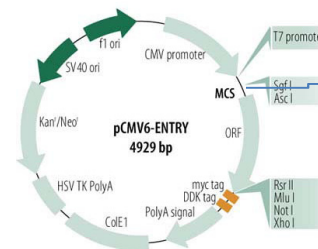

Supplement: NIHMS689139-supplement-6.pdf [file NIHMS689139-supplement-6.pdf]
